# Supplementary material for: Exploring the relationship between women’s experience of postnatal care and reported staffing measures: an observational study
Source: medRxiv preprint, doi:10.1101/2022.04.03.22272935, version 1 (2022-04-05)

## S4. Relationship between staffing and patient experience at Trust level (univariable)

Mid and Highest tertile compared with lowest tertile as the reference group

**Question related to being Discharged without delay**


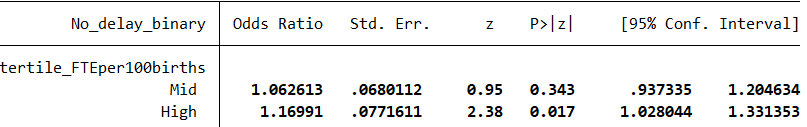


**Question related to Always having help when needed it**


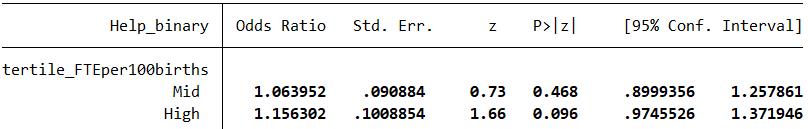


**Question related to Always having Info and explanations**


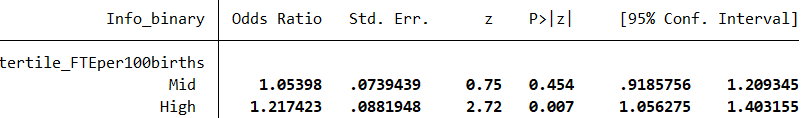


**Question related to Always being treated kindness and understanding**


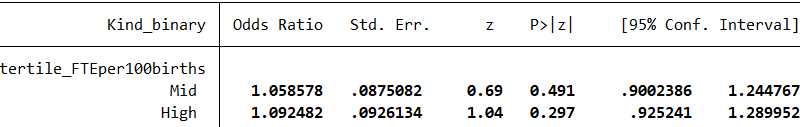

Supplement: S4 [file 272935_file05.docx]
